# Supplementary material
Source: PubMed Central journal article supplement (PMC5035592)
Supplement: NIHMS798678-supplement-09.pdf [file NIHMS798678-supplement-09.pdf]

elevated ratio (1.6) starting after 2 hours. Later time points were not recorded. The data are consistent with a prolonged VWF:Ag residence time.

### Supplemental movies

Intracellular localization of wtVWF (video 1) compared to mVWF (video 2).

After recombinant expression of wtVWF or mVWF in HEK293 cells for 48 h, the cells were fixed and VWF proteins (green) and PDI (red) were detected by indirect immunofluorescence employing rabbit anti-VWF and mouse anti-PDI antibodies, respectively. Z-stacks were recorded with a confocal microscope using an HC PL APO CS2 63.0x1.40 OIL UV objective and the following settings: image size of 512 × 512, laser power of the 543 and 488 lasers was set to 9 % and 20 %, respectively. 3D reconstruction was performed using the LAS software (Leica) and saved as movie files. A 360° rotation of a representative cell expressing either wtVWF or mVWF is shown in video 1 and 2, respectively.

### References

- 1 Sadler JE, Budde U, Eikenboom JC, Favalaro EJ, Hill FG, Holmberg L, Ingerslev J, Lee CA, Lillicrap D, Mannucci PM, Mazurier C, Meyer D, Nichols WL, Nishino M, Peake IR, Rodeghiero F, Schneppenheim R, Ruggeri ZM, Srivastava A, Montgomery RR, Federici AB, Working Party on von Willebrand Disease C. Update on the pathophysiology and classification of von Willebrand disease: a report of the Subcommittee on von Willebrand Factor. *J Thromb Haemost.* 2006; **4**: 2103-14.
- 2 Schneppenheim R, Budde U. von Willebrand factor: the complex molecular genetics of a multidomain and multifunctional protein. *J Thromb Haemost.* 2011; **9 Suppl 1**: 209-15.
- 3 Zimmerman TS, Dent JA, Ruggeri ZM, Nannini LH. Subunit composition of plasma von Willebrand factor. Cleavage is present in normal individuals, increased in IIA and IIB von Willebrand disease, but minimal in variants with aberrant structure of individual oligomers (types IIC, IID, and IIE). *J Clin Invest.* 1986; **77**: 947-51.
- 4 Schneppenheim R, Brassard J, Krey S, Budde U, Kunicki TJ, Holmberg L, Ware J, Ruggeri ZM. Defective dimerization of von Willebrand factor subunits due to a Cys-> Arg mutation in type IID von Willebrand disease. *Proc Natl Acad Sci U S A.* 1996; **93**: 3581-6.
- 5 Schneppenheim R, Michiels JJ, Obser T, Oyen F, Pieconka A, Schneppenheim S, Will K, Zieger B, Budde U. A cluster of mutations in the D3 domain of von Willebrand factor correlates with a distinct subgroup of von Willebrand disease: type 2A/IIIE. *Blood.* 2010; **115**: 4894-901.
- 6 Verweij CL, Hart M, Pannekoek H. Expression of variant von Willebrand factor (vWF) cDNA in heterologous cells: requirement of the pro-polypeptide in vWF multimer formation. *EMBO J.* 1987; **6**: 2885-90.
- 7 Wagner DD. Cell biology of von Willebrand factor. *Annu Rev Cell Biol.* 1990; **6**: 217-46.
- 8 Gaucher C, Dieval J, Mazurier C. Characterization of von Willebrand factor gene defects in two unrelated patients with type IIC von Willebrand disease. *Blood.* 1994; **84**: 1024-30.
- 9 Schneppenheim R, Thomas KB, Krey S, Budde U, Jessat U, Sutor AH, Zieger B. Identification of a candidate missense mutation in a family with von Willebrand disease type IIC. *Hum Genet.* 1995; **95**: 681-6.
